1 **Title Page**

2 Title: Enhanced physician performance when using an artificial intelligence model to detect  
3 ischemic stroke on computed tomography

4

5 Authors:

6 James M Hillis, MBBS DPhil\*<sup>1,2,3</sup>

7 Bernardo C Bizzo, MD PhD\*<sup>1,3,4</sup>

8 Romane Gauriau, PhD<sup>1</sup>

9 Christopher P Bridge, DPhil<sup>1,3,5</sup>

10 John K Chin, MD<sup>1</sup>

11 Buthaina Hakamy, MBBS<sup>1</sup>

12 Sarah Mercaldo, PhD<sup>1,3,4</sup>

13 John Conklin, MD<sup>3,4</sup>

14 Sayon Dutta, MD MPH<sup>3,6</sup>

15 William A Mehan, MD MBA<sup>1,3,4</sup>

16 Robert W Regenhardt, MD PhD<sup>2,3</sup>

17 Ajay Singh, MD<sup>3,4</sup>

18 Aneesh B Singhal, MBBS MD<sup>2,3</sup>

19 Jonathan D Sonis, MD MHCM<sup>3,6</sup>

20 Marc D Succj, MD<sup>3,4</sup>

21 Tianhao Zhang, PhD<sup>7</sup>

22 Bin Xing, PhD<sup>7</sup>

23 John F Kalafut, PhD<sup>7</sup>

24 Keith J Dreyer, DO PhD<sup>1,3,4</sup>

25 Michael H Lev, MD<sup>3,4</sup>

26 R Gilberto González, MD PhD<sup>3,4,5</sup>

27

28 \*These authors contributed equally to the work.

29

30 Author Affiliations:

31 <sup>1</sup>Data Science Office, Mass General Brigham, Boston, MA, USA

32 <sup>2</sup>Department of Neurology, Massachusetts General Hospital, Boston, MA, USA

33 <sup>3</sup>Harvard Medical School, Boston, MA, USA

34 <sup>4</sup>Department of Radiology, Massachusetts General Hospital, Boston, MA, USA

35 <sup>5</sup>Athinoula A. Martinos Center for Biomedical Imaging, Massachusetts General Hospital

36 <sup>6</sup>Department of Emergency Medicine, Massachusetts General Hospital, Boston, MA, USA

37 <sup>7</sup>GE Healthcare

38

39 Corresponding author:

40 Dr. James Hillis

41 Digital CRO, Data Science Office, Mass General Brigham

42 Suite 1303, Floor 13, 100 Cambridge St, Boston, MA 02114

43 james.hillis@mgh.harvard.edu

44 617-726-2000

45

46 Date of revision: January 16 2023

47 **Abstract (word count: 55)**

48 Acute ischemic stroke can be subtle to detect on non-contrast computed tomography imaging.

49 We show that a novel artificial intelligence model significantly improves the performance of

50 physicians, including ED physicians, neurologists and radiologists, in identifying and quantifying

51 the volume of acute ischemic stroke lesions. This model may lead to improved clinical decision-

52 making for stroke patients.

53 **Article (word count: 1,118)**

54 The early imaging features of acute ischemic stroke on non-contrast computed tomography  
55 (CT) can be subtle. We previously reported the development of a deep learning model that  
56 detects ischemic core on CT studies and was superior to three experienced neuroradiologists.<sup>1</sup>  
57 As part of its training, the model utilized segmentations obtained from the region of acute  
58 infarct on paired magnetic resonance imaging (MRI) studies that were then registered onto the  
59 CT studies. This design had recognized that MRI better detects early acute ischemic stroke but  
60 CT is a cheaper, quicker and more widely available imaging modality.

61  
62 In further evaluating this model, we wished to see how its use impacted physicians who were  
63 interpreting non-contrast CT studies. We therefore designed a multi-reader multi-case study  
64 whereby physicians interpreted 180 CT cases both with and without the use of the model  
65 (Supplementary Figure 1). There were 8 physicians (2 emergency physicians, 2 emergency  
66 radiologists, 2 neurologists, 2 neuroradiologists) who each interpreted 90 cases with the model  
67 output and 90 cases without the model output (Figure 1A). After a four-week washout period,  
68 they interpreted the cases in the opposite manner (i.e., the cases that they had previously  
69 interpreted without the model output were now interpreted with the model output).

70  
71 The model output included the binary classification of whether ischemic core  $\geq 5\text{mL}$  was  
72 present. If there was ischemic core  $\geq 5\text{mL}$ , the output also included the volume of the ischemic  
73 core and the segmented region of the ischemic core. The physicians were asked up to three  
74 multiple choice questions: the presence of any ischemic core (positive, negative), their level of

75 certainty for the presence or absence (scale of 1-7; see Supplementary Table 1 for details), and,  
76 if they stated the presence of ischemic core, their volume estimate (0-20mL, 20-50mL, >50mL;  
77 upper bound of range considered inclusive). Their responses were compared to the ground  
78 truth interpretations demonstrated by diffusion imaging on a paired MRI case.

79  
80 The physicians performed significantly better at binary detection when using the model  
81 compared with not using the model. Their area under the receiver operating characteristic  
82 curve (AUC) improved from 0.696 to 0.836 (difference 0.141; 95% CI: 0.081-0.200;  $p < 0.001$ ;  
83 Figure 1B and Table 1). Their sensitivity improved from 53.9% to 66.9% (difference 13.1%; 95%  
84 CI: 6.5-19.6%;  $p < 0.001$ ). Their specificity improved from 78.9% to 89.2% (difference 10.3%; 95%  
85 CI: 6.6-14.0%;  $p < 0.001$ ). Their interpretation time also improved from 62.30 seconds to 43.92  
86 seconds (difference 18.38 seconds; 95% CI: 15.59-21.18 seconds;  $p < 0.001$ ).

87  
88 These improvements were maintained across most specialties as part of a subgroup analysis  
89 (Table 1). The physicians with the greatest improvement were emergency physicians and  
90 emergency radiologists, which is consistent with them having the least experience in  
91 interpreting brain imaging and therefore having the greatest opportunity to benefit. The  
92 physicians with the least improvement were neuroradiologists, who have the most experience.

93  
94 The improvement in sensitivity was most pronounced for larger infarct volumes (Table 1). The  
95 physicians' sensitivity improved from 54.2% without the model output to 84.6% with the model  
96 output for 20-50mL infarcts, and 61.7% to 84.2% for >50mL infarcts. These large infarcts are

97 more likely to involve a large vessel occlusion, which means the patients could benefit from  
98 treatment with endovascular thrombectomy.<sup>2-8</sup> The increased ability to detect these infarcts  
99 could prompt physicians to obtain CT angiography to detect a large vessel occlusion and cue the  
100 physicians interpreting the CT angiography to the likely vessel involved. This increased ability to  
101 detect may also lead to improved triage and sooner evaluation for endovascular  
102 thrombectomy. A decreased time to thrombectomy has previously been shown to improve  
103 outcomes.<sup>9</sup>

104  
105 There was, however, a decline in sensitivity for infarct volumes 0-5mL (Table 1). This decreased  
106 performance was expected given that the model only outputs whether it has detected ischemic  
107 core  $\geq 5\text{mL}$  (i.e., so the model should classify these cases as negative). The reason for the model  
108 using this volume threshold is to avoid false positive interpretations from small regions of noise  
109 on a CT study; the clinical concern is for such interpretations to increase MRI utilization to  
110 evaluate for infarct more definitively. While we acknowledge the subsequent decreased  
111 sensitivity amongst physicians for these infarct volumes, it is important to recognize that this  
112 study occurred outside of the clinical environment where other factors, especially the acute  
113 onset of neurologic symptoms, could alert physicians to the occurrence of ischemic stroke.

114  
115 The physicians also performed better at volume quantification when using the model (Figure  
116 1C). They correctly identified the volume range 73.8% of the time for  $>50\text{mL}$  infarcts with the  
117 model output compared to 27.1% without the model output. They correctly identified the

118 volume range 58.8% of the time for 20-50mL infarcts with the model output compared to  
119 30.4% without the model output.

120  
121 A key consideration moving forward is how the model might impact clinical workflow. Currently  
122 the clinical paradigm is that an ischemic stroke should be assumed when a patient presents  
123 with stroke-like symptoms and a non-contrast CT does not reveal an abnormality; the key  
124 reason for obtaining the CT is to exclude intracranial hemorrhage. This study demonstrates the  
125 model improves physicians' detection of ischemic core. Further research should be conducted  
126 to determine whether the CT could be used more than it currently is for confirmation of  
127 ischemic core. For instance, confirmation of ischemic core on non-contrast CT could be  
128 particularly helpful when a patient's symptoms are ambiguous and ischemic stroke has not  
129 been considered as a likely differential diagnosis. The presence of ischemic core could help  
130 trigger and triage the next management steps such as CT angiography, administration of  
131 thrombolytic medication and consideration of endovascular thrombectomy.<sup>10</sup>

132  
133 The model most helped physicians with less experience in interpreting brain imaging and may  
134 be most beneficial in rural areas with fewer subspecialty physicians. The model may separately  
135 be most helpful at hospitals that can perform non-contrast CT but do not have emergent access  
136 to advanced imaging modalities like CT perfusion or MRI. It may therefore assist in reducing the  
137 urban-rural inequities in acute stroke care.<sup>11</sup>

138

139 A limitation of this study was that the cases were taken from the test set from model  
140 development. While these cases were sequestered and not exposed to the model during  
141 development, they are likely to be the most similar to the training cases and therefore provide  
142 the best model performance. The assessment of generalizability of the model will benefit from  
143 evaluation on a more diverse dataset prior to clinical use. We note that the physicians were not  
144 aware of the standalone model performance on these cases during this study.

145

146 Overall, this study demonstrates how the use of an artificial intelligence model enhances  
147 physicians' identification and volume quantification of ischemic core on non-contrast CT. It  
148 suggests that the model could provide benefit in the acute stroke clinical environment.



## 149 **Methods**

### 150 **Study design**

151 This retrospective multi-reader multi-case study was conducted using radiology cases from  
152 hospitals within the Mass General Brigham network. It was approved by the Mass General  
153 Brigham Institutional Review Board with waiver of informed consent per the Common Rule. It  
154 was conducted in accordance with relevant guidelines and regulations including the Health  
155 Insurance Portability and Accountability Act (HIPAA). This report followed the Standards for  
156 Reporting Diagnostic Accuracy (STARD 2015) reporting guideline.

157

### 158 **Case selection and model inference**

159 The 180 cases were selected from the test set that had been used at the time of model  
160 development.<sup>1</sup> As described previously, they had accompanying MRI studies that were used to  
161 establish the ground truth interpretations (within 3 hours of the CT for positive cases and 5  
162 days for negative cases). They were selected using stratified randomization from the entire  
163 primary test set such that there were 30 cases with ischemic core 0-20mL, 30 cases with  
164 ischemic core 20-50mL, 30 cases with ischemic core >50mL and 90 cases without any ischemic  
165 core. This randomization ensured there were cases on which the model performed accurately  
166 and inaccurately (see Supplementary Table 2 for standalone model performance on these  
167 cases).

168

169 For the studies without the model output, the physicians were provided with only the axial  
170 5mm series. For the studies with the model output, the physicians were provided with the axial

171 5mm series and an identical series with the model output incorporated into the imaging pixel  
172 data (Figure 1A). The physicians were able to visualize these two series simultaneously in  
173 adjacent window panes. The outputs included the binary classification of whether ischemic core  
174  $\geq 5\text{mL}$  was present, and, if it was present, the volume of the ischemic core and the segmented  
175 region of the ischemic core. The volume threshold of 5mL is proposed for future clinical use  
176 given it optimizes specificity by avoiding false positive interpretations through incorrect  
177 interpretation of small regions of noise on CT.

178

### 179 **Physicians**

180 The physicians were chosen to ensure representation of likely future clinical users including  
181 emergency physicians, emergency radiologists, neurologists and neuroradiologists. They were  
182 all board-certified for their relevant specialty. They were trained on the annotation tasks and  
183 completed twelve training cases. They had not been involved with model development and  
184 were not aware of prior model performance results. They were informed that specificity was  
185 prioritized over sensitivity as part of the model design given that future clinical users should  
186 similarly be aware of this fact.

187

### 188 **Reader study process**

189 The multi-reader multi-case study design involved the physicians interpreting all radiology  
190 studies twice: both with and without the model output (Supplementary Figure 1). The  
191 interpretations were performed as part of two sessions that were separated by at least four  
192 weeks as recommended by the US Food and Drug Administration<sup>12</sup>; each study was interpreted

193 once in each session. Within each session, half of the studies were interpreted with the model  
194 output and half of the studies without the model output; the studies were interpreted in the  
195 opposite manner for the other session. The studies were split into two batches to facilitate  
196 these interpretations. The order of studies within each session was randomized and differed for  
197 each physician. The interpretation of the first batch of studies with or without model output for  
198 each physician was also randomized.

199  
200 The physicians were assisted in working through the cases by an internal web-based annotation  
201 system that required them to interpret the cases in the defined order. This annotation system  
202 incorporated the FDA-cleared eUnity image visualization software (Version 6 or higher). The  
203 physicians were firstly asked about the presence of any ischemic core (positive, negative). They  
204 were then asked their level of certainty for this ischemic core on a scale of 1-7 (see  
205 Supplementary Table 1 for options). If they stated that ischemic core was present, they were  
206 also asked to estimate the volume (0-20mL, 20-50mL, >50mL; the upper bound of these ranges  
207 was considered inclusive). The annotation system also recorded the start and stop times for the  
208 interpretation of each case. When submitting the annotations for each case, the physicians  
209 could opt to move to the next case or exit; they did not need to interpret all cases in a single  
210 sitting.

## 211 212 **Statistical techniques**

213 This study was a pilot multi-reader multi-case study for this model. The predefined primary  
214 assessment was comparison of the AUC with and without the model outputs. The predefined

215 secondary assessments were comparison of sensitivity, specificity and interpretation time with  
216 and without the model outputs. The specialty subgroup analysis, infarct volume subgroup  
217 analysis and volume quantification analysis were calculated as exploratory assessments. Given  
218 the pilot nature of this study, there was not an estimated effect size and powering was not  
219 performed. There were no missing data with the exception of the excluded interpretation times  
220 as described below.

221  
222 The selection of cases involved multiple randomization procedures including for the cases  
223 selected in each batch, the interpretation order for each physician, and whether the first batch  
224 for a physician was with or without model output. This randomization used the Latin squares  
225 methodology.

226  
227 The analysis of the AUC was based on the 7-point scale assessments from each physician and  
228 the ground truth interpretations based on the MRI. The overall comparison between the two  
229 methods (with and without model outputs) was derived from the difference between the mean  
230 AUCs<sup>13</sup> via analysis of variance (ANOVA), taking into account the variability components:  
231 methods, physicians, cases and their interactions. The analysis was implemented by using the  
232 OR-DBM MRMC software package version 2.5 or higher.<sup>14,15</sup> The ANOVA model treated both  
233 physicians and cases as random samples, to be able to draw inferences for the whole  
234 population of physicians and cases. Two-sided p-values were based on 95% confidence intervals  
235 of the difference in AUCs.

236

237 The analysis of sensitivity and specificity used the binary interpretations from each physician  
238 and the ground truth interpretations based on the MRI. The comparison between the two  
239 methods (with and without model outputs) was based on the generalized estimating equations  
240 (GEE) model<sup>16</sup> by using SAS procedure PROC GENMOD, taking into account repeated  
241 observations from the MRMC design. Based on SAS GENMOD, case was treated as the repeated  
242 subject, accounting for correlations of physician and method within case, by using an  
243 exchangeable covariance structure. Two-sided p-values were based on 95% confidence  
244 intervals of the difference in sensitivity and specificity.

245  
246 The analysis of interpretation time was performed in SAS using a repeated measures ANOVA.  
247 Two-sided p-values were based on 95% confidence intervals of the difference in interpretation  
248 time. Thirteen interpretation times (from 2880 interpretations) were excluded; the paired study  
249 for the same physician (i.e., the equivalent case with or without model output) was also  
250 excluded to ensure balance of such exclusions. These exclusions occurred for two reasons.  
251 Firstly, the physicians could notify study management if an interpretation time should be  
252 excluded (e.g., they were interrupted). Secondly, the annotation system initially recorded the  
253 start time for each case incorrectly; to ensure consistency across the entire cohort, the  
254 interpretation time was rederived by calculating the difference in start time with the  
255 subsequent case or the difference in stop time with the previous case (the minimum of these  
256 times was taken); the interpretation times were excluded if this derived number did not appear  
257 consistent with an expected duration (e.g., it appeared a physician only interpreted one case in  
258 a sitting so the difference in times with the previous and subsequent cases would be incorrect).

259

260 The analysis of volume outputs used the volume estimates from each physician and the ground  
261 truth interpretations based on the MRI. The frequencies of how the volume estimates matched  
262 with ranges of ground truth volumes of the two methods (with and without model outputs)  
263 were calculated using Microsoft Excel.

## 264 **Acknowledgements**

265 The authors thank the broader Mass General Brigham Data Science Office and GE Healthcare  
266 teams for their assistance with this project.

267

## 268 **Funding**

269 This study was funded by GE Healthcare. JMH, BCB, RG, CPB, JKC, BH, SM, JC, SD, WAH, RWR,  
270 AS, ABS, JDS, MDS, KJD, MHL, RGG were employees of Mass General Brigham and/or  
271 Massachusetts General Hospital at the time of this study, which had received institutional  
272 funding from GE Healthcare for the study. TZ, BX, JFK were employees of GE Healthcare at the  
273 time of this study.

274

## 275 **Competing interests**

276 RWR reports the following competing interests: Rapid Medical – Clinical Trial DSMB;  
277 Microvention – Site PI; Penumbra – Site PI; National Institute of Neurological Disorders and  
278 Stroke – Research Grant; Society of Vascular and Interventional Neurology – Research Grant;  
279 Heitman Foundation – Research Grant.

280

## 281 **Data availability**

282 The data used were obtained from hospitals within the Mass General Brigham network. Data  
283 use was approved by relevant Institutional Review Board. The data are not publicly available  
284 and restrictions apply to their use.

285

286 **Author contributions**

287 JMH, BCB, JKC, TZ, JFK, KJD, MHL and RGG conceptualized the study. JMH, BCB, RG, CPB, JKC

288 and BH conducted the study including producing the model output. JC, SD, WAH, RWR, AS, ABS,

289 JDS and MDS were physician readers. SM, TZ and BX performed the randomization and

290 statistical analysis. JMH drafted the manuscript text and figures. All authors reviewed the

291 manuscript.



## 292 References

- 293 1 Bizzo, B. C. *et al.* *Head CT Deep Learning Model for Early Stroke Identification*  
294 *Outperforms Human Experts* (Research Square, 2021).
- 295 2 Berkhemer, O. A. *et al.* A randomized trial of intraarterial treatment for acute ischemic  
296 stroke. *N Engl J Med* **372**, 11-20, doi:10.1056/NEJMoa1411587 (2015).
- 297 3 Goyal, M. *et al.* Randomized assessment of rapid endovascular treatment of ischemic  
298 stroke. *N Engl J Med* **372**, 1019-1030, doi:10.1056/NEJMoa1414905 (2015).
- 299 4 Saver, J. L. *et al.* Stent-retriever thrombectomy after intravenous t-PA vs. t-PA alone in  
300 stroke. *N Engl J Med* **372**, 2285-2295, doi:10.1056/NEJMoa1415061 (2015).
- 301 5 Campbell, B. C. *et al.* Endovascular therapy for ischemic stroke with perfusion-imaging  
302 selection. *N Engl J Med* **372**, 1009-1018, doi:10.1056/NEJMoa1414792 (2015).
- 303 6 Jovin, T. G. *et al.* Thrombectomy within 8 hours after symptom onset in ischemic stroke.  
304 *N Engl J Med* **372**, 2296-2306, doi:10.1056/NEJMoa1503780 (2015).
- 305 7 Nogueira, R. G. *et al.* Thrombectomy 6 to 24 Hours after Stroke with a Mismatch  
306 between Deficit and Infarct. *N Engl J Med* **378**, 11-21, doi:10.1056/NEJMoa1706442  
307 (2018).
- 308 8 Albers, G. W. *et al.* Thrombectomy for Stroke at 6 to 16 Hours with Selection by  
309 Perfusion Imaging. *N Engl J Med* **378**, 708-718, doi:10.1056/NEJMoa1713973 (2018).
- 310 9 Jahan, R. *et al.* Association Between Time to Treatment With Endovascular Reperfusion  
311 Therapy and Outcomes in Patients With Acute Ischemic Stroke Treated in Clinical  
312 Practice. *JAMA* **322**, 252-263, doi:10.1001/jama.2019.8286 (2019).
- 313 10 Powers, W. J. *et al.* Guidelines for the Early Management of Patients With Acute  
314 Ischemic Stroke: 2019 Update to the 2018 Guidelines for the Early Management of  
315 Acute Ischemic Stroke: A Guideline for Healthcare Professionals From the American  
316 Heart Association/American Stroke Association. *Stroke* **50**, e344-e418,  
317 doi:10.1161/STR.0000000000000211 (2019).
- 318 11 Hammond, G., Luke, A. A., Elson, L., Towfighi, A. & Joynt Maddox, K. E. Urban-Rural  
319 Inequities in Acute Stroke Care and In-Hospital Mortality. *Stroke* **51**, 2131-2138,  
320 doi:10.1161/STROKEAHA.120.029318 (2020).
- 321 12 US Food and Drug Administration. *Clinical Performance Assessment: Considerations for*  
322 *Computer-Assisted Detection Devices Applied to Radiology Images and Radiology Device*  
323 *Data in Premarket Notification (510(k)) Submissions*,  
324 <https://www.fda.gov/media/77642/download> (2022).
- 325 13 Hillis, S. L., Obuchowski, N. A., Scharzt, K. M. & Berbaum, K. S. A comparison of the  
326 Dorfman-Berbaum-Metz and Obuchowski-Rockette methods for receiver operating  
327 characteristic (ROC) data. *Stat Med* **24**, 1579-1607, doi:10.1002/sim.2024 (2005).
- 328 14 Hillis, S. L., Berbaum, K. S. & Metz, C. E. Recent developments in the Dorfman-Berbaum-  
329 Metz procedure for multireader ROC study analysis. *Acad Radiol* **15**, 647-661,  
330 doi:10.1016/j.acra.2007.12.015 (2008).
- 331 15 Hillis, S. L. & Scharzt, K. M. Multireader sample size program for diagnostic studies:  
332 demonstration and methodology. *J Med Imaging (Bellingham)* **5**, 045503,  
333 doi:10.1117/1.JMI.5.4.045503 (2018).

334 16 *Generalized Estimating Equations,*  
335 <https://support.sas.com/rnd/app/stat/topics/gee/gee.pdf> (<  
336

337 **Figure Legends**

338 **Figure 1: A.** Example of two cases with and without model output showing text incorporating  
339 binary classification for ischemic core  $\geq 5\text{mL}$  and volume, and purple segmented region. The first  
340 case, with infarct volume 77mL on MRI, was detected by 1 out of the 8 physicians without  
341 model output and 6 with model output. The second case, with infarct volume 45mL on MRI,  
342 was detected by 2 without model output and 8 with model output. **B.** Receiver operating  
343 characteristic curves for both with model output and without model output. **C.** Confusion  
344 matrices comparing physician volume with ground truth volume; a correct volume estimate  
345 occurs on the diagonal; a volume of 0mL reflects a negative case.

346 **Tables**

347 **Table 1:** Results summary for physician performance comparing interpretations performed with  
 348 or without the model outputs.  
 349

|                                                                              | Metric <sub>with</sub> | Metric <sub>without</sub> | Difference (95% CI)          | p value |
|------------------------------------------------------------------------------|------------------------|---------------------------|------------------------------|---------|
| <b>AUC</b>                                                                   |                        |                           |                              |         |
| Overall                                                                      | 0.836                  | 0.696                     | 0.141 (0.081 to 0.200)       | <0.001  |
| ED Physician                                                                 | 0.820                  | 0.632                     | 0.188 (0.119 to 0.256)       | <0.001  |
| ED Radiologist                                                               | 0.805                  | 0.617                     | 0.188 (0.098 to 0.279)       | 0.003   |
| Neurologist                                                                  | 0.854                  | 0.738                     | 0.116 (0.081 to 0.151)       | 0.001   |
| Neuroradiologist                                                             | 0.866                  | 0.796                     | 0.070 (-0.337 to 0.477)      | 0.328   |
| <b>Sensitivity</b>                                                           |                        |                           |                              |         |
| Overall                                                                      | 66.9%                  | 53.9%                     | 13.1% (6.5 to 19.6%)         | <0.001  |
| ED Physician                                                                 | 64.4%                  | 43.9%                     | 20.6% (10.4% to 30.8%)       | <0.001  |
| ED Radiologist                                                               | 74.4%                  | 48.9%                     | 25.6% (16.0% to 35.1%)       | <0.001  |
| Neurologist                                                                  | 70.6%                  | 69.4%                     | 1.1% (-8.0% to 10.3%)        | 0.814   |
| Neuroradiologist                                                             | 58.3%                  | 53.3%                     | 5.0% (-1.0% to 11.4%)        | 0.123   |
| <b>Specificity</b>                                                           |                        |                           |                              |         |
| Overall                                                                      | 89.2%                  | 78.9%                     | 10.3% (6.6 to 14.0%)         | <0.001  |
| ED Physician                                                                 | 91.1%                  | 78.3%                     | 12.8% (6.1% to 19.4%)        | <0.001  |
| ED Radiologist                                                               | 76.7%                  | 72.8%                     | 3.9% (-4.7% to 12.5%)        | 0.376   |
| Neurologist                                                                  | 91.1%                  | 69.4%                     | 21.7% (15.5% to 27.8%)       | <0.001  |
| Neuroradiologist                                                             | 97.8%                  | 95.0%                     | 2.8% (-0.4% to 6.0%)         | 0.090   |
| <b>Interpretation time</b>                                                   |                        |                           |                              |         |
| Overall                                                                      | 43.92s                 | 62.30s                    | -18.38s (-21.18s to -15.59s) | <0.001  |
| ED Physician                                                                 | 40.74s                 | 61.91s                    | -21.17s (-25.95s to -16.38s) | <0.001  |
| ED Radiologist                                                               | 42.01s                 | 70.58s                    | -28.57s (-37.03s to -20.10s) | <0.001  |
| Neurologist                                                                  | 40.59s                 | 60.79s                    | -20.20s (-24.32s to -16.07s) | <0.001  |
| Neuroradiologist                                                             | 52.33s                 | 55.94s                    | -3.60s (-7.12s to -0.09s)    | 0.044   |
| <b>Sensitivity for different infarct volumes (based on MRI ground truth)</b> |                        |                           |                              |         |
| 0-5mL                                                                        | 16.0%                  | 34.7%                     | -18.8% (-28.2% to -9.3%)     | <0.001  |
| 5-20mL                                                                       | 56.3%                  | 62.5%                     | -6.3% (-21.1% to 8.6%)       | 0.410   |
| 20-50mL                                                                      | 84.6%                  | 54.2%                     | 30.4% (23.6% to 37.3%)       | <0.001  |
| >50mL                                                                        | 84.2%                  | 61.7%                     | 22.5% (14.1% to 30.9%)       | <0.001  |

350

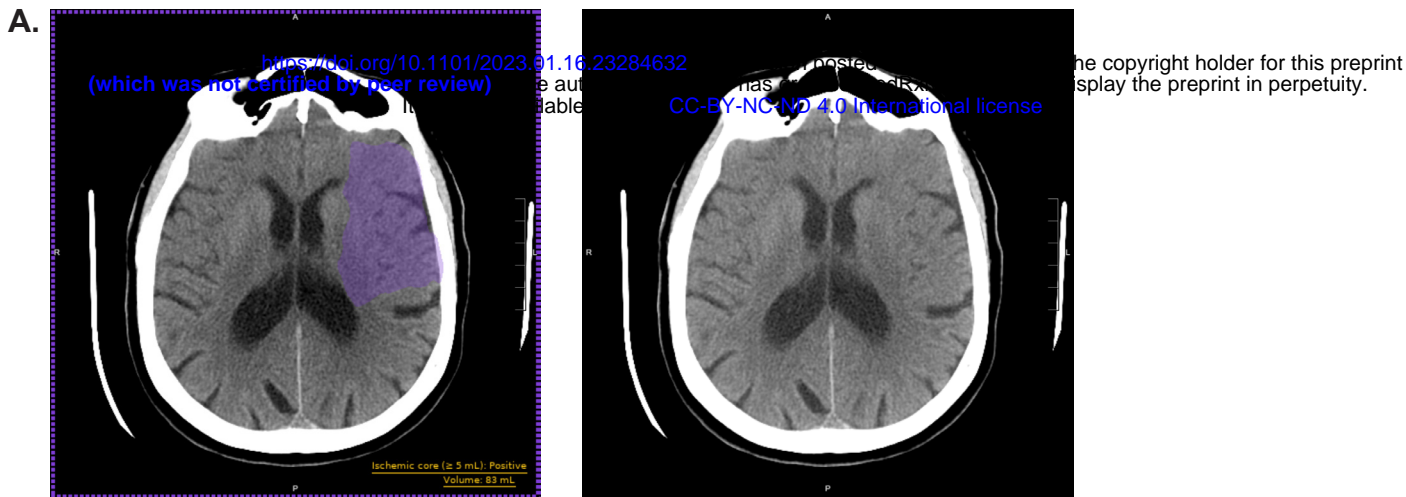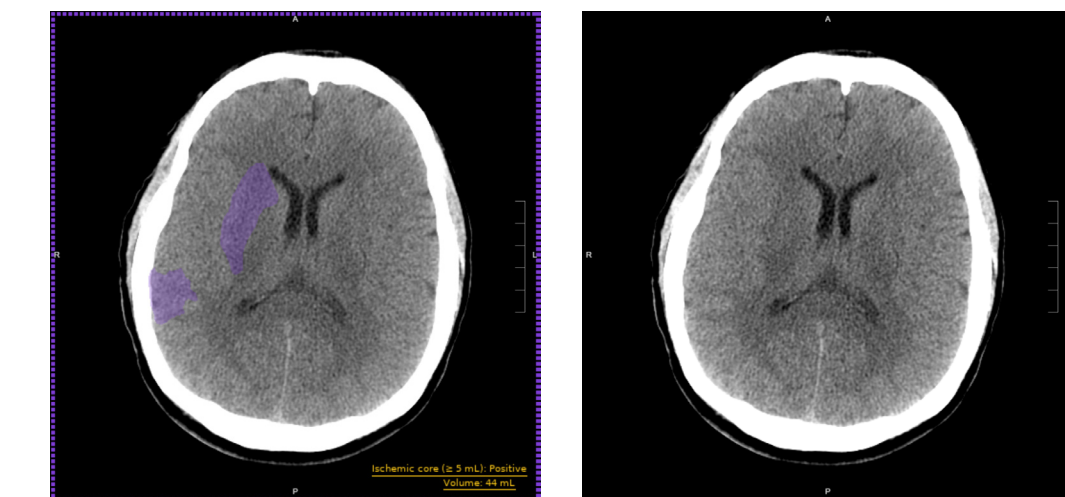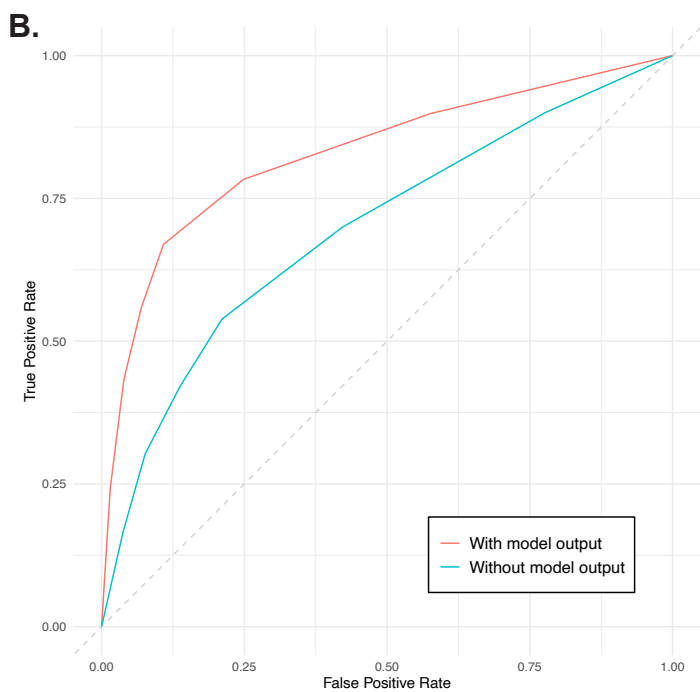

**C.**

**With model output**

|                           |         | N   | Physician volume |        |         |       |
|---------------------------|---------|-----|------------------|--------|---------|-------|
|                           |         |     | 0mL              | 0-20mL | 20-50mL | >50mL |
| Ground truth (MRI) volume | 0mL     | 720 | 89.2%            | 6.4%   | 3.8%    | 0.7%  |
|                           | 0-20mL  | 240 | 67.9%            | 20.4%  | 9.6%    | 2.1%  |
|                           | 20-50mL | 240 | 15.4%            | 16.7%  | 58.8%   | 9.2%  |
|                           | >50mL   | 240 | 15.8%            | 2.5%   | 7.9%    | 73.8% |

**Without model output**

|                           |         | N   | Physician volume |        |         |       |
|---------------------------|---------|-----|------------------|--------|---------|-------|
|                           |         |     | 0mL              | 0-20mL | 20-50mL | >50mL |
| Ground truth (MRI) volume | 0mL     | 720 | 78.9%            | 10.7%  | 6.9%    | 3.5%  |
|                           | 0-20mL  | 240 | 54.2%            | 26.7%  | 16.3%   | 2.9%  |
|                           | 20-50mL | 240 | 45.8%            | 17.1%  | 30.4%   | 6.7%  |
|                           | >50mL   | 240 | 38.3%            | 16.7%  | 17.9%   | 27.1% |
